# Supplementary material for: Plasmodium P-Type Cyclin CYC3 Modulates Endomitotic Growth during Oocyst Development in Mosquitoes
Source: PLoS Pathog. 2015 Nov 13;11(11):e1005273. doi: 10.1371/journal.ppat.1005273 (PMC4643991; doi:10.1371/journal.ppat.1005273)
Supplement: S3 Table — (XLSX) [file ppat.1005273.s009.xlsx]

## Sheet: Sheet3
Supplementary Table S3: RNA-seq data and GO annotation functional clusters used to generate the heat maps.
gene id	AG log2 fold change	Ook log2 fold change	shortname	product	Functional Group
PBANKA_093450	-0.426745	-2.59657	PRL	protein tyrosine phosphatase	phosphatases
PBANKA_091340	0.0556691	-2.04666	PPM8	protein phosphatase PPM8	phosphatases
PBANKA_100770	0.131249	-1.73469	PPM1	protein phosphatase PPM1	phosphatases
PBANKA_142700	-0.683535	-0.465135	PPM7	protein phosphatase PPM7	phosphatases
PBANKA_021100	-0.475541	-0.776463	TIM50	mitochondrial import inner membrane translocase subunit TIM50, putative	phosphatases
PBANKA_140770	-0.63141	-0.913802	PPM6	protein phosphatase PPM6	phosphatases
PBANKA_146220	-0.0554377	-0.852335	PPM4	protein phosphatase PPM4	phosphatases
PBANKA_091020	-0.0370139	-0.376635	PPM2	protein phosphatase PPM2	phosphatases
PBANKA_123490	0.103863	-0.329917	PPM9	protein phosphatase PPM9	phosphatases
PBANKA_121110	0.158269	-0.310076	NIF4	NLI interacting factor-like phosphatase	phosphatases
PBANKA_113190	0.540263	-0.702575	PP5	serine/threonine protein phosphatase 5	phosphatases
PBANKA_111550	1.38909	-0.347872	NIF2	NLI interacting factor-like phosphatase	phosphatases
PBANKA_060470	0.445835	2.59529	SHLP2	shewanella-like protein phosphatase 2, putative	phosphatases
PBANKA_131870	0.556818	2.1035	PPM3	protein phosphatase PPM3	phosphatases
PBANKA_134650	0.844612	2.05057	PTPLA	protein tyrosine phosphatase-like protein	phosphatases
PBANKA_142720	0.624739	0.421869	PPM5	protein phosphatase PPM5	phosphatases
PBANKA_122740	0.400898	0.489481	CNA	serine/threonine protein phosphatase 2B catalytic subunit A	phosphatases
PBANKA_041210	0.303091	0.199868	PPP6	serine/threonine protein phosphatase 6	phosphatases
PBANKA_102830	0.247635	-0.0417448	PP1	serine/threonine protein phosphatase PP1	phosphatases
PBANKA_102010	-0.129813	0.171268	PP7	serine/threonine protein phosphatase 7	phosphatases
PBANKA_122390	0.0370759	0.366097	PTP2	protein tyrosine phosphatase	phosphatases
PBANKA_113200	-0.130662	0.615415	NIF3	NLI interacting factor-like phosphatase	phosphatases
PBANKA_140330	-0.486373	1.16033	NIF1	NLI interacting factor-like phosphatase	phosphatases
PBANKA_082620	0.384317	1.10511	PBANKA_082620	protein phosphatase-beta, putative	phosphatases
PBANKA_132950	-0.728025	0.538946	PPKL	protein phosphatase containing kelch-like domains	phosphatases
PBANKA_133240	-0.846949	0.455618	SHLP1	shewanella-like protein phosphatase 1	phosphatases
PBANKA_040720	-0.92164	0.632089	YVH1	dual specificity protein phosphatase	phosphatases
PBANKA_050250	-1.12121	0.0856223	PPP8	serine/threonine protein phosphatase 8	phosphatases
PBANKA_131880	-1.63934	0.765512	PTP1	protein tyrosine phosphatase	phosphatases
PBANKA_082850	-1.65385	1.03191	PPP4	serine/threonine protein phosphatase 4	phosphatases
PBANKA_040320	0.301976	2.18981	CSP	circumsporozoite (CS) protein	cell invasion
PBANKA_040260	-0.350488	1.63376	IMC1a	inner membrane complex protein 1a	cell invasion
PBANKA_100630	-0.459811	1.93506	PLP1	sporozoite micronemal protein essential for cell traversal perforin-like protein 1	cell invasion
PBANKA_135560	-0.63689	1.9153	SPECT1	sporozoite protein essential for cell traversal	cell invasion
PBANKA_041380	-1.28296	1.57937	MA	microneme associated antigen, putative	cell invasion
PBANKA_071160	-1.17	0.890666	PLP5	perforin-like protein 5	cell invasion
PBANKA_143230	-1.65533	0.976887	CelTOS	cell traversal protein for ookinetes and sporozoites	cell invasion
PBANKA_082420	-1.58788	0.467947	PLP3	perforin-like protein 3	cell invasion
PBANKA_020910	-0.791838	-0.0793398	TRSP	thrombospondin related sporozoite protein	cell invasion
PBANKA_093200	-0.709313	-0.0585106	RON4	rhoptry neck protein 4	cell invasion
PBANKA_134980	-0.567817	0.861838	TRAP	thrombospondin-related anonymous protein sporozoite surface protein 2	cell invasion
PBANKA_131270	0.31381	0.519229	GEST	gamete egress and sporozoite traversal protein	cell invasion
PBANKA_124300	0.184569	0.0678311	DHHC7	palmitoyltransferase	cell invasion
PBANKA_093350	0.242953	-0.0290319	ROM1	rhomboid protease ROM1	cell invasion
PBANKA_121510	0.537428	-0.804392	RIPR	Rh5 interacting protein, putative	cell invasion
PBANKA_081300	0.167305	-1.04628	ICP	inhibitor of cysteine proteases	cell invasion
PBANKA_070190	-0.106229	-0.868203	GAMA	GPI-anchored micronemal antigen, putative	cell invasion
PBANKA_091170	-0.152326	-0.780194	SUB2	subtilisin-like protease 2	cell invasion
PBANKA_091500	-0.230052	-1.92005	AMA1	apical membrane antigen 1	cell invasion
PBANKA_041290	-2.18432	-1.37933	CTRP	circumsporozoite- and TRAP-related protein	cell invasion
PBANKA_103780	-2.15821	-0.555484	SOAP	secreted ookinete adhesive protein	cell invasion
PBANKA_131370	0.0231512	-2.98084	PBANKA_131370	serine/threonine protein kinase, putative	kinases
PBANKA_100820	0.59385	-3.13474	PKG	cGMP-dependent protein kinase	kinases
PBANKA_083560	0.705185	-1.82066	PKAc	cAMP-dependent protein kinase catalytic subunit	kinases
PBANKA_141450	-1.6137	0.649066	PBANKA_141450	protein kinase, putative	kinases
PBANKA_090380	-1.49083	0.4398	PBANKA_090380	serine/threonine protein kinase, putative	kinases
PBANKA_146000	-1.45375	0.26738	PKB	rac-beta serine/threonine protein kinase, putative	kinases
PBANKA_031140	-1.64561	0.254387	PBANKA_031140	serine/threonine protein kinase, putative	kinases
PBANKA_145340	-1.27644	-0.0853293	PK2	protein kinase 2	kinases
PBANKA_040820	-1.95812	-0.809541	CDPK3	calcium-dependent protein kinase 3	kinases
PBANKA_040110	-0.457359	-0.98098	SRPK1	serine/threonine protein kinase, putative	kinases
PBANKA_093860	0.0432525	-1.11793	CK2a	casein kinase 2, alpha subunit	kinases
PBANKA_071730	0.199306	-1.19909	CRK3	cdc2-related protein kinase 3	kinases
PBANKA_061580	0.286815	-0.963584	EST	exported serine/threonine protein kinase	kinases
PBANKA_031420	0.149379	-0.497312	CDPK1	calcium-dependent protein kinase 1	kinases
PBANKA_093300	0.028442	-0.37533	CLK3	serine/threonine protein kinase, putative	kinases
PBANKA_141360	1.34355	0.273164	PBANKA_141360	serine/threonine protein kinase, putative	kinases
PBANKA_135090	0.258696	0.086297	PK6	protein kinase 6	kinases
PBANKA_146050	0.386066	0.398561	PBANKA_146050	serine/threonine protein kinase, putative	kinases
PBANKA_121280	0.352264	0.412777	MRK	MO15-related protein kinase	kinases
PBANKA_080220	0.281324	0.574422	PBANKA_080220	serine/threonine protein kinase, putative	kinases
PBANKA_082710	0.532877	0.694762	PBANKA_082710	protein kinase, putative	kinases
PBANKA_082960	0.671068	0.66229	PBANKA_082960	serine/threonine protein kinase, putative	kinases
PBANKA_061520	0.672023	0.743658	CDPK4	calcium-dependent protein kinase 4	kinases
PBANKA_123020	0.574466	0.984339	CRK5	cdc2-related protein kinase 5	kinases
PBANKA_091210	0.510568	0.955597	CK1	casein kinase 1	kinases
PBANKA_093370	0.663854	1.30036	MAPK2	mitogen-activated protein kinase 2	kinases
PBANKA_094200	1.0034	0.869821	PBANKA_094200	calcium/calmodulin-dependent protein kinase, putative	kinases
PBANKA_135150	1.11393	0.970245	CDPK5	calcium-dependent protein kinase 5	kinases
PBANKA_080800	0.18863	1.57786	CRK4	cdc2-related protein kinase 4	kinases
PBANKA_010410	0.15633	1.54058	ARK1	serine/threonine protein kinase, putative	kinases
PBANKA_101330	-0.076234	1.65741	MAPK1	mitogen-activated protein kinase 1	kinases
PBANKA_130690	-0.832669	0.990229	SRPK2	serine/threonine protein kinase, putative	kinases
PBANKA_135260	-0.393594	1.18169	PBANKA_135260	serine/threonine protein kinase, putative	kinases
PBANKA_092550	-0.259544	1.17816	CDPK6	calcium-dependent protein kinase 6	kinases
PBANKA_041040	-0.129081	0.836993	GSK3	glycogen synthase kinase 3	kinases
PBANKA_040740	-0.100529	0.569308	ARK2	serine/threonine protein kinase, putative	kinases
PBANKA_130920	-0.315269	0.0546338	CLK1	serine/threonine kinase-1, putative	kinases
PBANKA_092640	-0.369487	0.139166	PBANKA_092640	serine/threonine protein kinase, putative	kinases
PBANKA_113320	-0.542973	0.409176	CRK2	cdc2-related kinase 2	kinases
PBANKA_070970	-0.578631	0.307604	PK1	protein kinase 1	kinases
PBANKA_092520	-0.899411	0.302664	CDPK7	calcium-dependent protein kinase 7	kinases
PBANKA_101980	-1.52199	1.13486	PBANKA_101980	calcium-dependent protein kinase, putative	kinases
PBANKA_124070	-1.36787	1.22058	NEK2	NIMA related kinase 2	kinases
PBANKA_113310	-1.10767	1.35108	ARK3	serine/threonine protein kinase, putative	kinases
PBANKA_031030	-1.04047	1.57038	PK7	protein kinase 7	kinases
PBANKA_040940	-1.31679	1.94862	PKRP	protein kinase, putative	kinases
PBANKA_071990	-0.955274	2.25828	CRK1	cdc2-related protein kinase 1	kinases
PBANKA_061670	-0.719278	2.00985	NEK4	NIMA related kinase 4	kinases
PBANKA_131800	-0.469403	1.92145	KIN	serine/threonine protein kinase KIN, putative	kinases
PBANKA_122540	0.216351	-1.43867	GAMER	IMC-associated apicomplexan protein gamete release protein	inner membrane complex
PBANKA_040200	0.575492	-0.422474	DHHC1	palmitoyltransferase, putative	inner membrane complex
PBANKA_101300	0.815131	0.0766577	ISC3	inner membrane complex suture component, putative	inner membrane complex
PBANKA_132430	0.0654439	0.55477	ISP3	inner membrane complex sub-compartment protein 3	inner membrane complex
PBANKA_020460	-0.349392	0.161879	PBANKA_020460	photosensitized INA-labeled protein PHIL1, putative	inner membrane complex
PBANKA_120940	-0.599849	0.300964	ISP1	inner membrane complex sub-compartment protein 1	inner membrane complex
PBANKA_121910	-0.673652	0.498511	IMC1d	inner membrane complex protein 1d	inner membrane complex
PBANKA_143660	-1.42726	-0.498573	IMC1h	inner membrane complex protein 1h	inner membrane complex
PBANKA_052390	-1.44876	-0.308382	GAPM2	glideosome associated protein with multiple membrane spans 2, putative	inner membrane complex
PBANKA_111530	-1.38279	-0.244155	GAP40	glideosome-associated protein 40, putative	inner membrane complex
PBANKA_124060	-1.69841	-0.265467	IMC1g	inner membrane complex protein 1g, putative	inner membrane complex
PBANKA_110990	-1.3835	-0.0108297	SIP	stripes inner membrane complex protein, putative	inner membrane complex
PBANKA_120200	-1.57991	0.308699	IMC1c	inner membrane complex protein 1c	inner membrane complex
PBANKA_136440	-2.00586	0.0132424	IMC1f	inner membrane complex protein 1f, putative	inner membrane complex
PBANKA_135850	-0.846241	0.789259	PBANKA_135850	inner membrane complex protein, putative	inner membrane complex
PBANKA_133890	-1.36651	0.729235	GAPM1	glideosome associated protein with multiple membrane spans 1, putative	inner membrane complex
PBANKA_102570	-1.50502	0.782002	IMC1l	inner membrane complex protein 1l, putative	inner membrane complex
PBANKA_093210	-1.38334	1.0365	DHHC9	palmitoyltransferase	inner membrane complex
PBANKA_090710	-1.30584	1.04989	IMC1b	inner membrane complex protein 1b	inner membrane complex
PBANKA_112040	-1.25928	1.11767	ALV7	Pfs77 homologue, putative inner membrane complex protein 1j, putative	inner membrane complex
PBANKA_070710	-1.28871	1.22938	IMC1i	inner membrane complex protein 1i	inner membrane complex
PBANKA_040270	-1.23888	1.30266	IMC1e	inner membrane complex protein 1e	inner membrane complex
PBANKA_092730	-1.20345	1.32947	DHHC3	palmitoyltransferase	inner membrane complex
PBANKA_051300	-1.71148	0.811064	IMC1m	inner membrane complex protein 1m, putative	inner membrane complex
PBANKA_145950	-2.00187	0.748793	MTIP	myosin A tail domain interacting protein MTIP, putative myosin light chain 1, putative	inner membrane complex
PBANKA_135490	-1.82956	1.62928	IMC1k	inner membrane complex protein 1k, putative	inner membrane complex
PBANKA_135460	-1.54972	1.58961	ISC1	inner membrane complex suture component, putative	inner membrane complex
PBANKA_131130	-1.47477	1.78494	PBANKA_131130	inner membrane complex protein, putative	inner membrane complex
PBANKA_0402601	-0.350488	1.63376	IMC1a	inner membrane complex protein 1a	inner membrane complex
PBANKA_123730	0.388084	1.70834	PBANKA_123730	inner membrane complex protein, putative	inner membrane complex
PBANKA_123320	-0.737864	-1.48302	PBANKA_123320	cyclin, putative	cell cycle
PBANKA_052060	-0.332751	-1.52448	PBANKA_052060	enhancer of rudimentary homolog, putative	cell cycle
PBANKA_0717301	0.199306	-1.19909	CRK3	cdc2-related protein kinase 3	cell cycle
PBANKA_112340	0.297016	-1.02137	PBANKA_112340	anaphase-promoting complex subunit, putative	cell cycle
PBANKA_140400	0.463371	-0.716619	MKP1	mitogen-activated protein kinase phosphatase 1, putative	cell cycle
PBANKA_140320	0.46802	-0.593556	PBANKA_140320	cyclin, putative	cell cycle
PBANKA_110150	0.502554	-0.390458	PBANKA_110150	anaphase-promoting complex subunit, putative	cell cycle
PBANKA_010430	1.09321	0.672949	PBANKA_010430	cyclin dependent kinase binding protein, putative	cell cycle
PBANKA_051060	0.883668	0.78201	CDC20	cell division cycle protein 20 homolog	cell cycle
PBANKA_1230201	0.574466	0.984339	CRK5	cdc2-related protein kinase 5	cell cycle
PBANKA_0933701	0.663854	1.30036	MAPK2	mitogen-activated protein kinase 2	cell cycle
PBANKA_0808001	0.18863	1.57786	CRK4	cdc2-related protein kinase 4	cell cycle
PBANKA_020750	-0.0392466	0.855885	PBANKA_020750	conserved Plasmodium protein, unknown function	cell cycle
PBANKA_0407401	-0.100529	0.569308	ARK2	serine/threonine protein kinase, putative	cell cycle
PBANKA_144220	0.237569	0.484374	PBANKA_144220	cyclin-related protein, putative	cell cycle
PBANKA_143320	-0.0173416	0.157508	PBANKA_143320	anaphase promoting complex subunit 10, putative	cell cycle
PBANKA_1133201	-0.542973	0.409176	CRK2	cdc2-related kinase 2	cell cycle
PBANKA_082440	-0.675513	0.539868	PBANKA_082440	cyclin-dependent kinases regulatory subunit, putative	cell cycle
PBANKA_111190	-0.888531	0.420219	MAT1	CDK-activating kinase assembly factor, putative	cell cycle
PBANKA_0719901	-0.955274	2.25828	CRK1	cdc2-related protein kinase 1	cell cycle
PBANKA_103430	-0.16691	-2.62334	AP2-G2	transcription factor with AP2 domain(s)	AP2 TFs
PBANKA_021440	-0.0180193	-2.57059	AP2-L	transcription factor with AP2 domain(s)	AP2 TFs
PBANKA_090960	-0.161378	-1.77413	PBANKA_090960	transcription factor with AP2 domain(s), putative	AP2 TFs
PBANKA_093230	-0.643235	-1.21754	PBANKA_093230	transcription factor with AP2 domain(s), putative	AP2 TFs
PBANKA_120590	-0.536674	-1.32646	PBANKA_120590	transcription factor with AP2 domain(s), putative	AP2 TFs
PBANKA_123160	-0.568684	-1.46017	PBANKA_123160	transcription factor with AP2 domain(s), putative	AP2 TFs
PBANKA_132980	-0.92648	-1.80165	AP2-Sp	transcription factor with AP2 domain(s)	AP2 TFs
PBANKA_052170	-1.06949	-0.970926	PBANKA_052170	transcription factor with AP2 domain(s), putative	AP2 TFs
PBANKA_093910	-0.827766	-0.646677	PBANKA_093910	transcription factor with AP2 domain(s), putative	AP2 TFs
PBANKA_112180	-0.0455075	-0.807204	PBANKA_112180	transcription factor with AP2 domain(s), putative	AP2 TFs
PBANKA_011210	-0.260684	-0.335231	PBANKA_011210	transcription factor with AP2 domain(s), putative	AP2 TFs
PBANKA_145370	0.232822	-0.373313	PBANKA_145370	transcription factor with AP2 domain(s), putative	AP2 TFs
PBANKA_101550	0.609514	-0.643237	PBANKA_101550	transcription factor with AP2 domain(s), putative	AP2 TFs
PBANKA_140370	-1.43757	0.255339	PBANKA_140370	transcription factor with AP2 domain(s), putative	AP2 TFs
PBANKA_090590	-0.897864	-0.224916	AP2-O	transcription factor with AP2 domain(s)	AP2 TFs
PBANKA_135600	-0.51213	-0.00114218	PBANKA_135600	transcription factor with AP2 domain(s), putative	AP2 TFs
PBANKA_010290	-0.662714	0.161295	SIP2	transcription factor with AP2 domain(s), putative SPE2-interacting protein, putative	AP2 TFs
PBANKA_083520	-0.558659	0.303497	PBANKA_083520	transcription factor with AP2 domain(s), putative	AP2 TFs
PBANKA_143750	0.0732872	0.204891	AP2-G	transcription factor with AP2 domain(s)	AP2 TFs
PBANKA_010950	0.0779131	0.348459	PBANKA_010950	transcription factor with AP2 domain(s), putative	AP2 TFs
PBANKA_122810	-0.166045	0.499488	PBANKA_122810	transcription factor with AP2 domain(s), putative	AP2 TFs
PBANKA_141570	-0.292129	0.854338	PBANKA_141570	transcription factor with AP2 domain(s), putative	AP2 TFs
PBANKA_136370	-0.658611	0.954392	PBANKA_136370	transcription factor with AP2 domain(s), putative	AP2 TFs
PBANKA_131970	-0.261803	1.24477	PBANKA_131970	transcription factor with AP2 domain(s), putative	AP2 TFs
PBANKA_100180	-0.238051	1.58533	PBANKA_100180	transcription factor with AP2 domain(s), putative	AP2 TFs
PBANKA_131320	-1.48249	2.18345	PBANKA_131320	transcription factor with AP2 domain(s), putative	AP2 TFs
